# Supplementary material for: Tailored design of mechanically sensitive biocatalytic assemblies based on polyelectrolyte multilayers
Source: Royal Society of Chemistry journal article supplement (doi:10.1039/c0jm03496g), 2011-01-01
Supplement: c0jm03496g.pdf [file c0jm03496g.pdf]

Electronic Supplementary Information

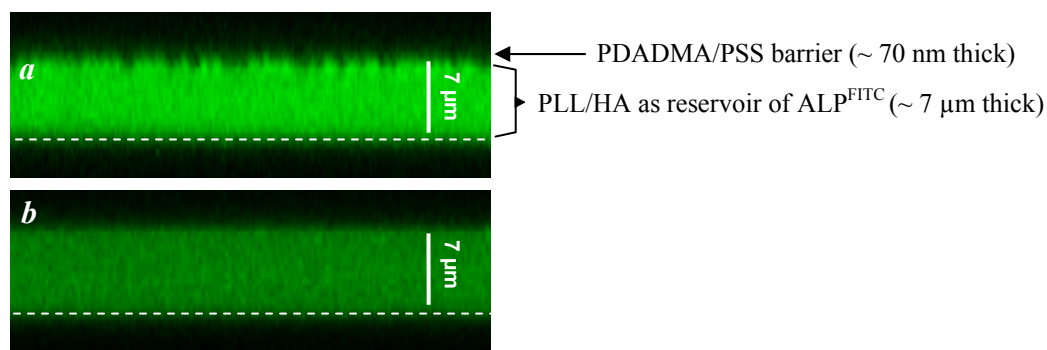

**Figure S1.** Confocal microscopy section ( $x,z$ ) images showing two enzymatic reservoirs with ALP<sup>FITC</sup> adsorbed at different levels in the film and capped with PDADMA/PSS barriers: (a) ALP<sup>FITC</sup> adsorbed after 30 bilayers deposition [(PLL/HA)<sub>30</sub>/PLL/ALP<sup>FITC</sup>/PLL/HA/(PDADMA/PSS)<sub>5</sub> film], (b) ALP<sup>FITC</sup> adsorbed at 15 bilayers deposition [(PLL/HA)<sub>15</sub>/PLL/ALP<sup>FITC</sup>(PLL/HA)<sub>15</sub>/(PDADMA/PSS)<sub>5</sub>] film.

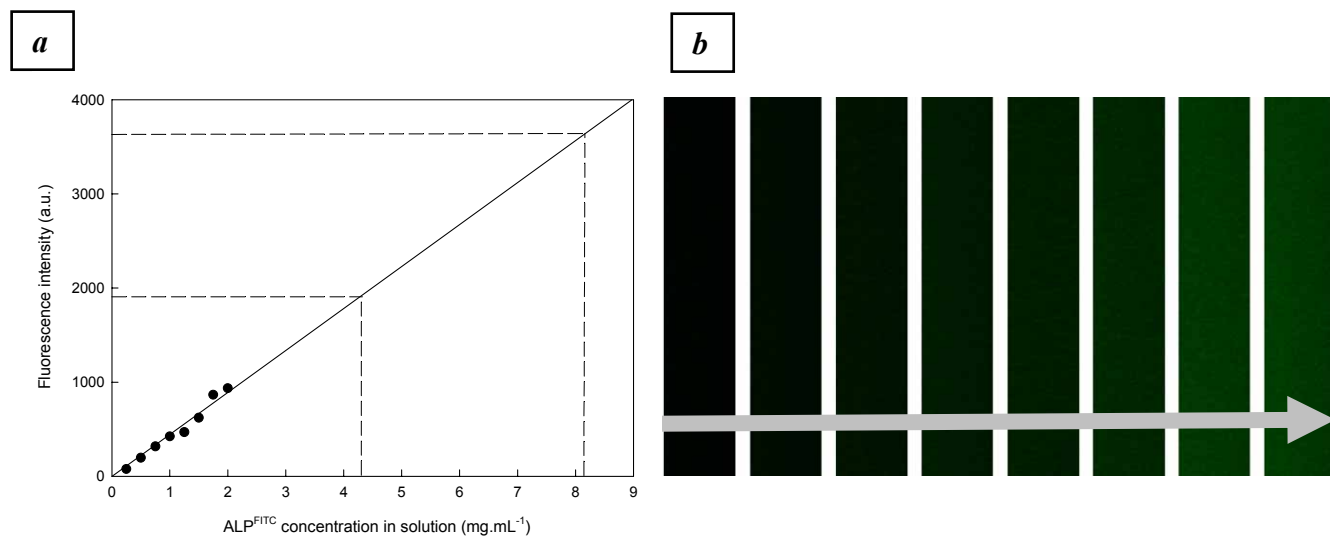

**Figure S2.** Calibration curve obtained by confocal microscopy: fluorescence intensity vs enzyme concentration in solution (a). Images in (b) show fluorescence evolution of enzyme solutions for increasing concentrations as guided by the grey arrow (from left, low concentrations, to right, high concentrations). The calibration curve and all images were performed with the same parameters of the microscope (detector gain and laser power).
